# Supplementary material
Source: Springer Nature journal article supplement (https://www.springermedizin.de/resource/supplementary/12936_2009_1128_MOESM2_ESM.pdf/9549918)

Village group

'Control'

'At-risk'

Percent respondents

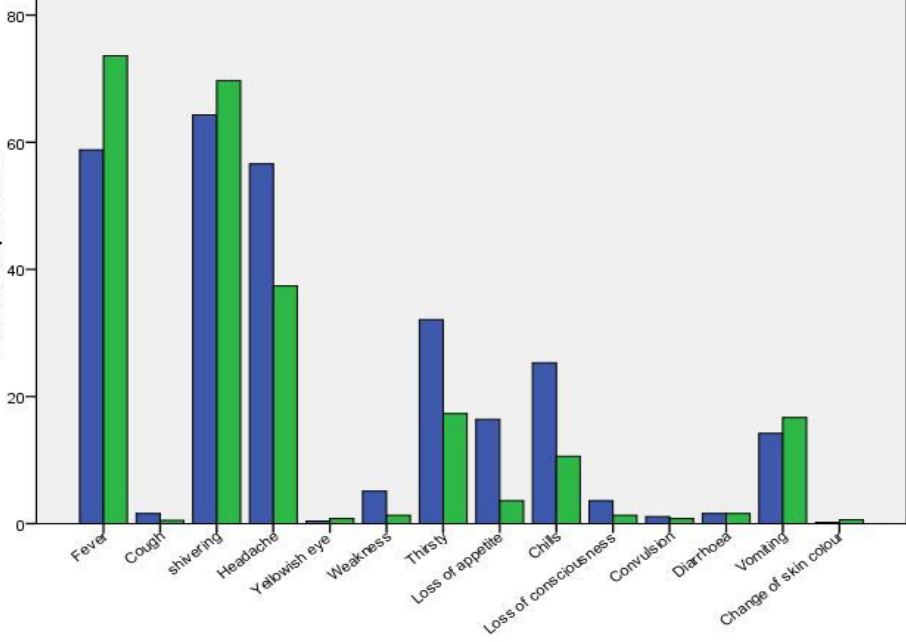

Supplement: MOESM2 [file 9549918]
